# Supplementary material for: Direct ink writing of polyimide aerogels for battery thermal mitigation
Source: Royal Society of Chemistry journal article supplement (doi:10.1039/d3lp00200d), 2023-12-13
Supplement: d3lp00200d1.pdf [file d3lp00200d1.pdf]

## Supporting Information for

### Direct Ink Writing of Polyimide Aerogels for Battery Thermal Mitigation

Ciera E. Cipriani,<sup>1</sup> Donald A. Dornbusch,<sup>2</sup> Stephanie L. Vivod,<sup>2\*</sup> Emily B. Pentzer<sup>\*1,3</sup>

<sup>1</sup>Department of Materials Science and Engineering, Texas A&M University, 3003 TAMU, College Station, Texas 77843, United States

<sup>2</sup>NASA Glenn Research Center, 21000 Brookpark Road, Cleveland, Ohio 44135, United States

<sup>3</sup>Department of Chemistry, Texas A&M University, 3255 TAMU, College Station, Texas 77843, United States

\*Email: emilypentzer@tamu.edu

**Table S1.** Dimensions, linear shrinkage values, masses, and densities of cast and printed compression cylinders.

|                | Height (mm) | Diameter (mm) | Linear Shrinkage (%) | Mass (g) | Density (g/cm <sup>3</sup> ) |
|----------------|-------------|---------------|----------------------|----------|------------------------------|
| <b>Cast</b>    | 15.42       | 12.48         | 12.30                | 0.206    | 0.109                        |
|                | 11.34       | 12.54         | 11.88                | 0.153    | 0.109                        |
|                | 14.9        | 12.55         | 11.81                | 0.200    | 0.109                        |
|                | 11.28       | 12.55         | 11.81                | 0.152    | 0.109                        |
|                | 12.48       | 12.54         | 11.88                | 0.167    | 0.108                        |
| <b>Printed</b> | 10.46       | 11.85         | 16.67                | 0.120    | 0.093                        |
|                | 10.34       | 11.43         | 19.67                | 0.118    | 0.100                        |
|                | 8.56        | 12.45         | 12.53                | 0.123    | 0.103                        |
|                | 10.87       | 12.68         | 10.87                | 0.154    | 0.105                        |
|                | 10.28       | 12.41         | 12.80                | 0.124    | 0.100                        |

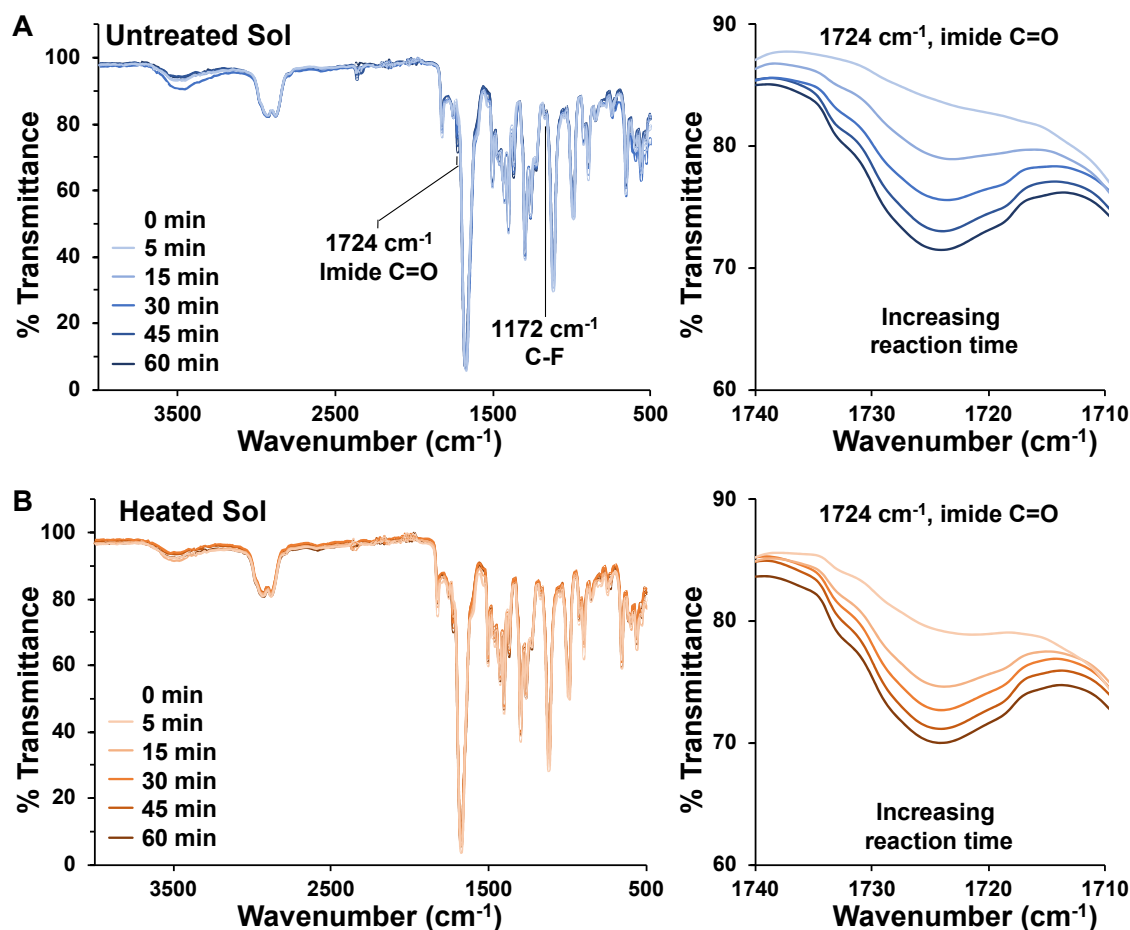

**Figure S1.** FTIR spectra during various timepoints after addition of TEA catalyst, normalized at 1172 cm<sup>-1</sup>. (A, left) Untreated sol, showing peaks corresponding to imide C=O at 1724 cm<sup>-1</sup> and C-F at 1172 cm<sup>-1</sup>. (A, right) Expansion of imide C=O region indicating increasing transmittance with increasing reaction time in untreated sol. (B, left) Heated sol. (B, right) Expansion of imide C=O region indicating increasing transmittance with increasing reaction time in heated sol.

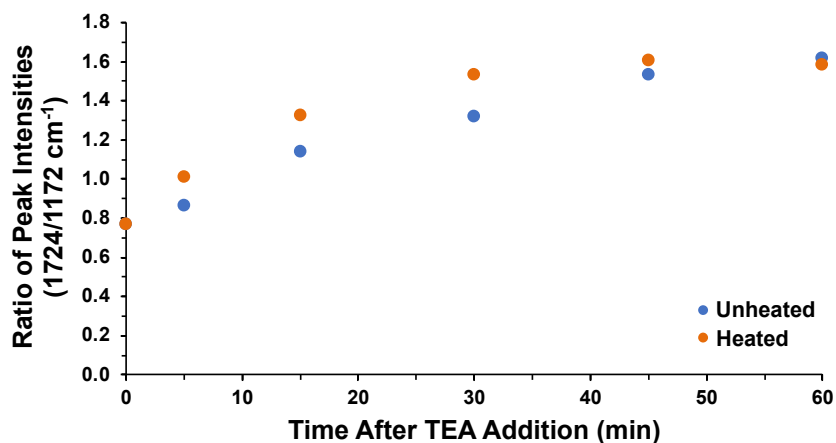

**Figure S2.** Ratios of intensities of C=O and C-F peaks in FTIR spectra over reaction time.

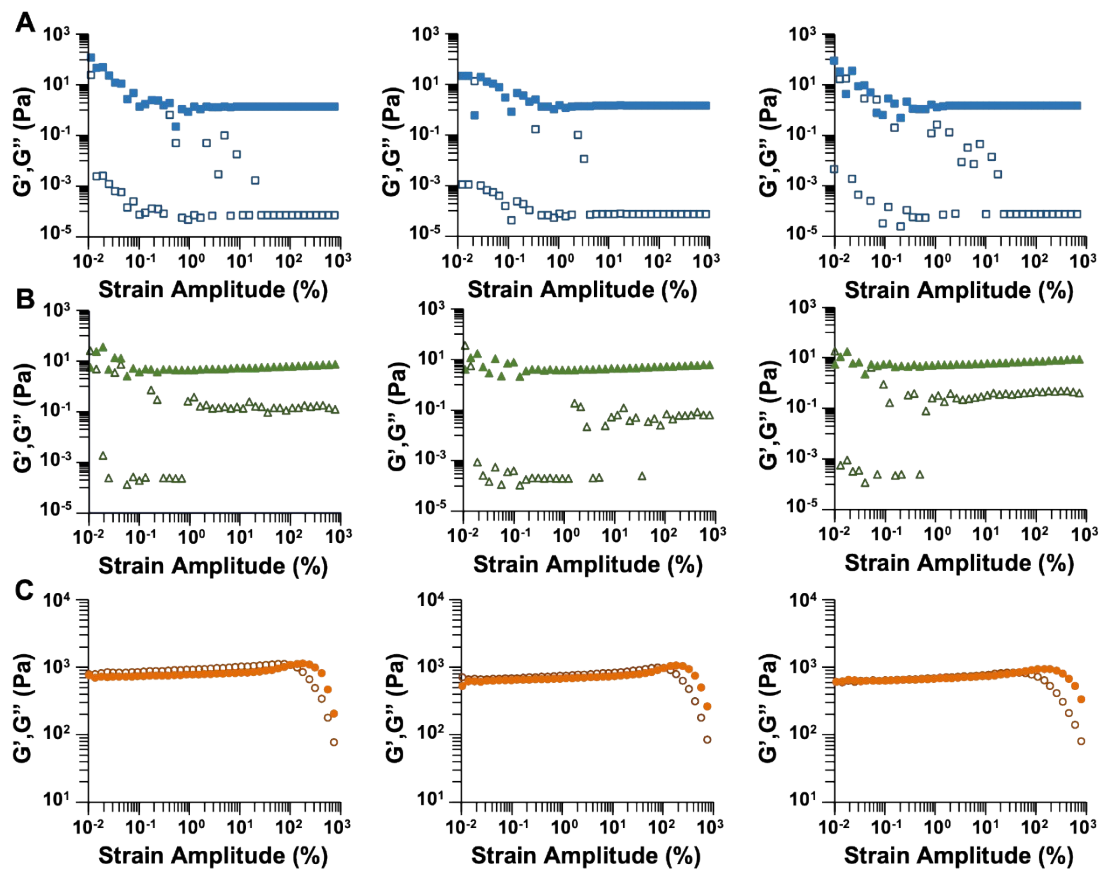

**Figure S3.**  $G'$  and  $G''$  as a function of strain amplitude for three samples of (A) untreated sol, (B) aged sol, (C) ink.

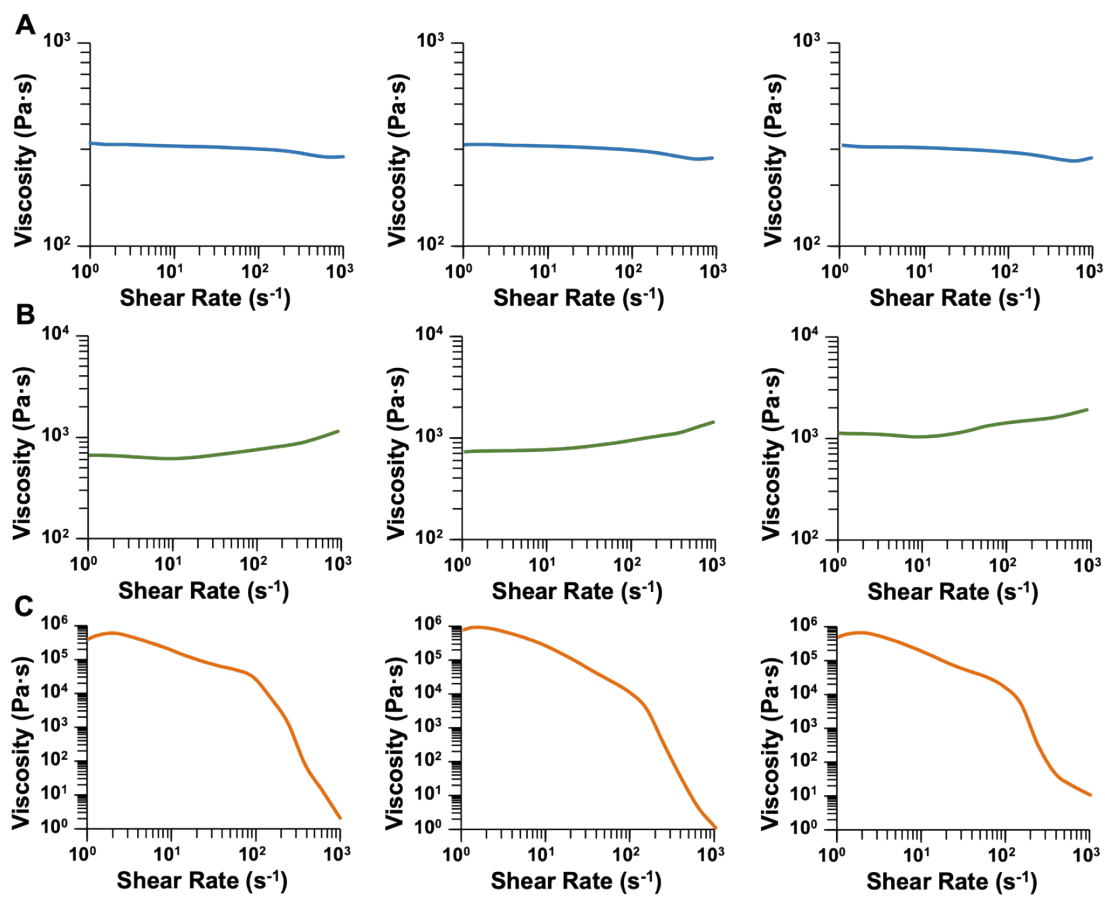

**Figure S4.** Viscosity as a function of shear rate for three samples of (A) untreated sol, (B) aged sol, (C) ink.

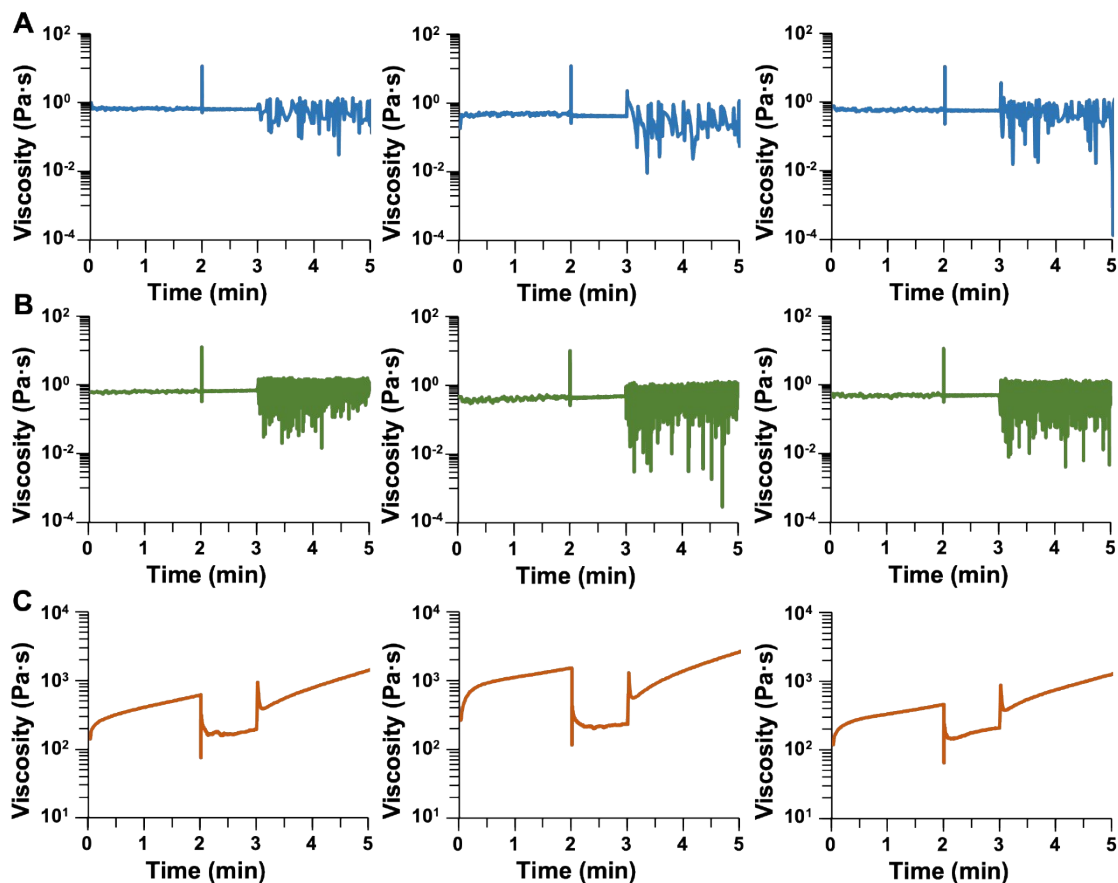

**Figure S5.** Viscosity as a function of time during the 3ITT for three samples of (A) untreated sol, (B) aged sol, (C) ink.

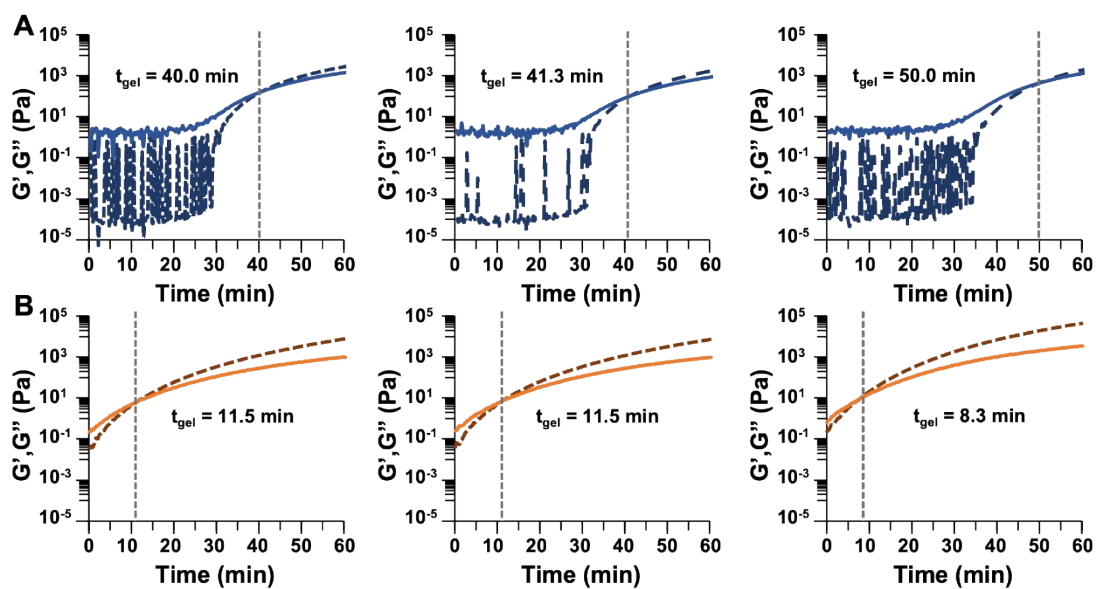

**Figure S6.**  $G'$  and  $G''$  as a function of time and gel points for three samples of (A) untreated sol and (B) ink.

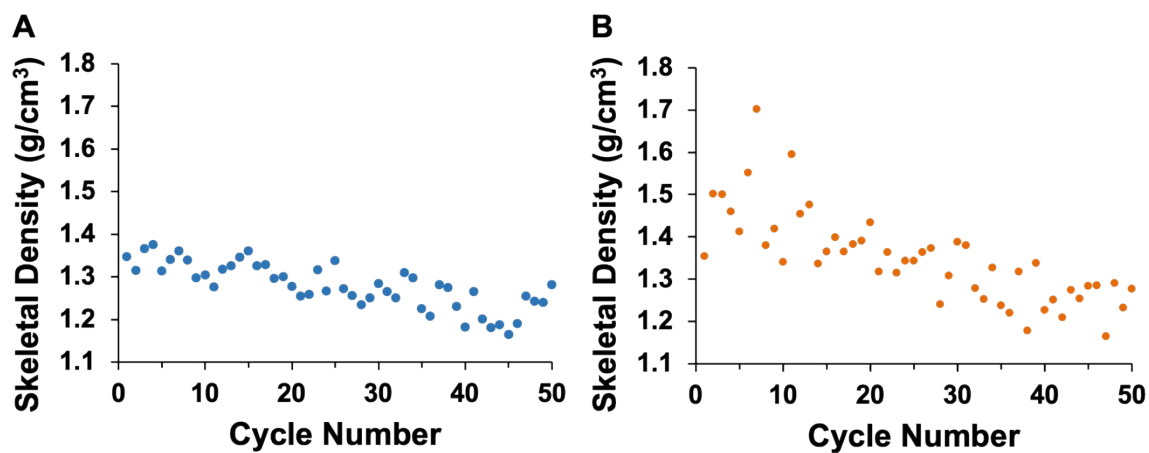

**Figure S7.** Skeletal density of (A) cast aerogel and (B) printed aerogel throughout 50 chamber filling cycles.

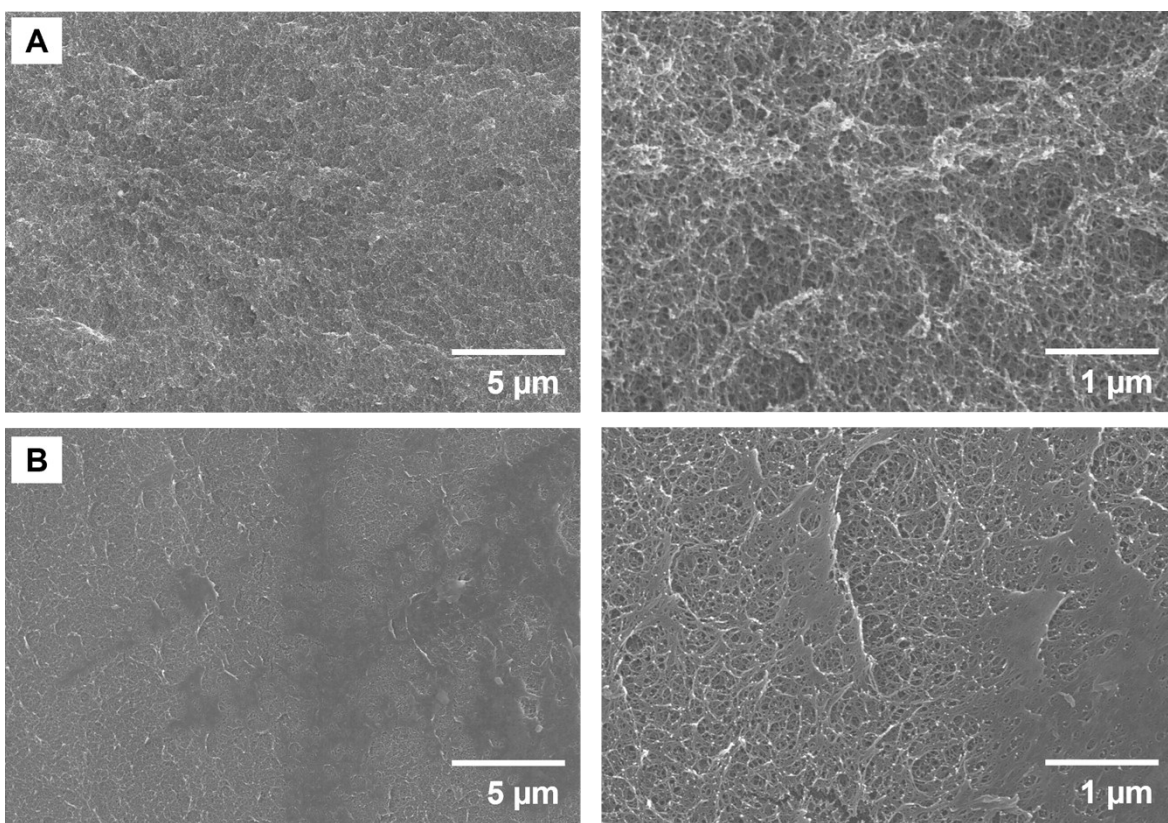

**Figure S8.** Scanning electron micrographs of fractured surfaces of (A) cast aerogel and (B) printed aerogel.

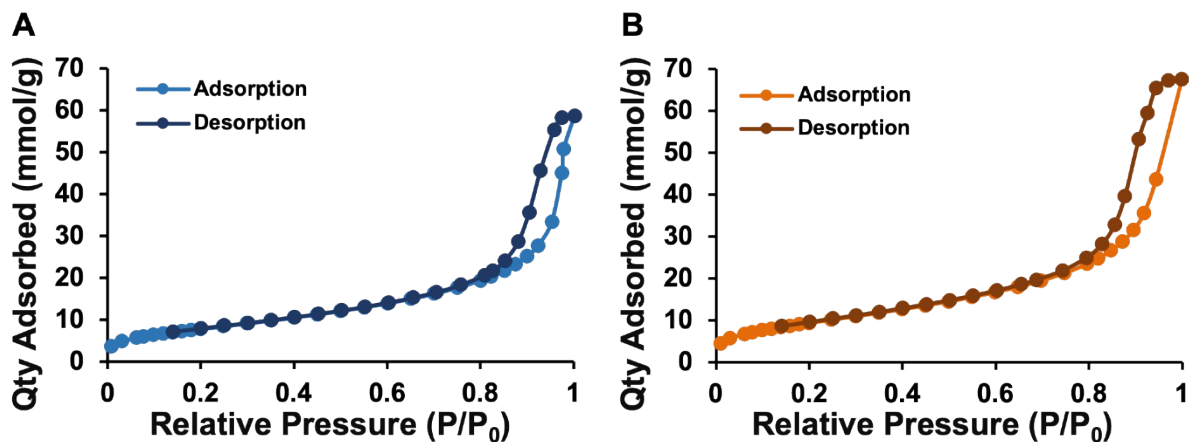

**Figure S9.** Adsorption-desorption curves of nitrogen onto (A) cast aerogel and (B) printed aerogel.

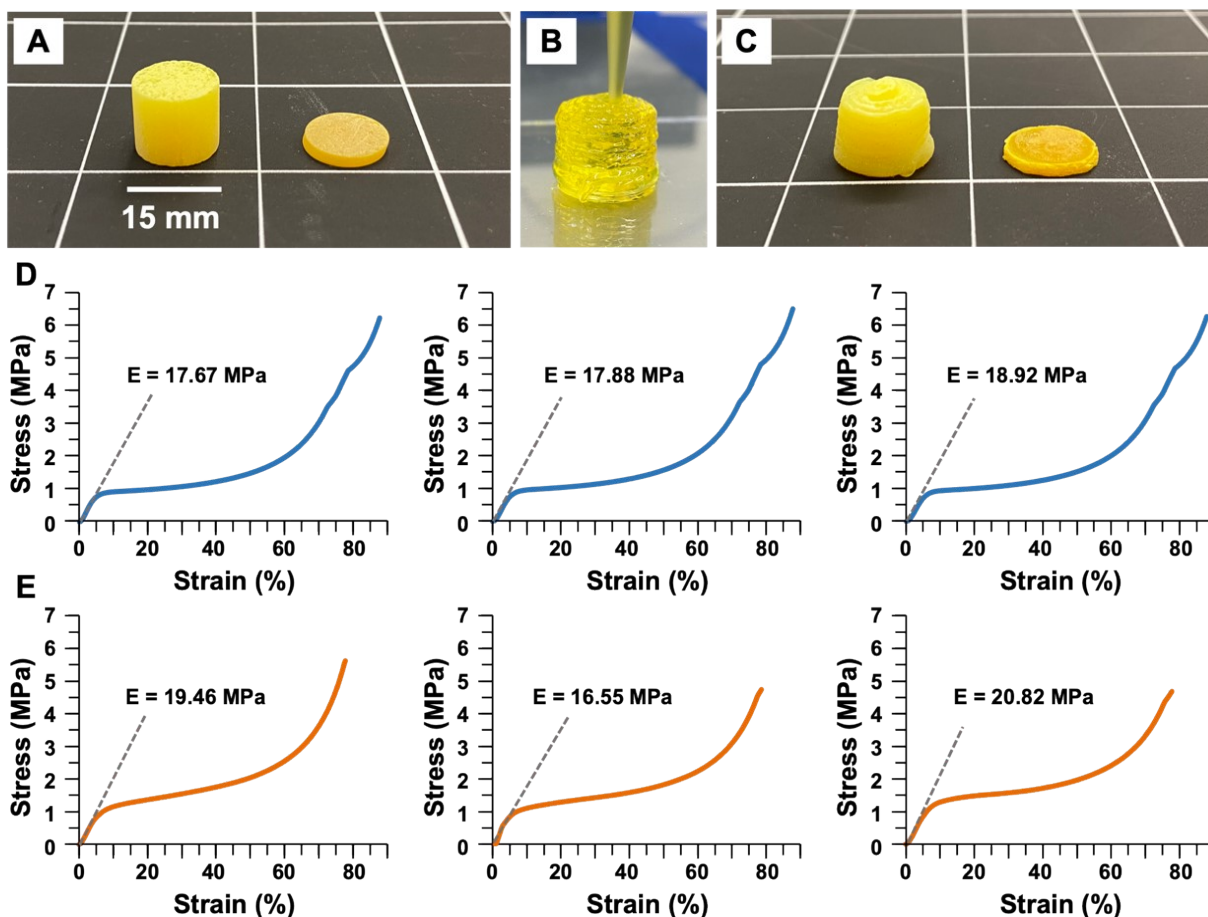

**Figure S10.** Compression test data. (A) Cast compression cylinder before (left) and after (right) testing. (B) DIW of compression cylinder. (C) Printed compression cylinder before (left) and after (right) testing. (D) Stress-strain profiles of three samples of cast aerogel. (E) Stress-strain profiles of three samples of printed aerogel.

**Table S2.** Thermal conductivities of cast and printed aerogels at various temperatures.

| Thermal Conductivity (mW/m K) |              |      |      |                 |      |      |
|-------------------------------|--------------|------|------|-----------------|------|------|
| Temperature (°C)              | Cast Aerogel |      |      | Printed Aerogel |      |      |
| -50                           | 39.6         | 39.3 | 39.4 | 24.0            | 24.4 | 23.4 |
| -25                           | 38.9         | 39.7 | 40.5 | 27.1            | 26.3 | 27.3 |
| 0                             | 39.1         | 39.6 | 39.6 | 30.7            | 30.8 | 30.6 |
| 25                            | 37.8         | 41.7 | 40.6 | 37.2            | 38.5 | 37.6 |
| 50                            | 34.4         | 34.6 | 34.5 | 35.2            | 34.5 | 34.7 |
| 75                            | 32.4         | 32.9 | 32.7 | 36.9            | 36.2 | 37.1 |
| 100                           | 33.4         | 32.5 | 33.6 | 38.3            | 37.5 | 37.9 |
| 125                           | 36.5         | 37.0 | 36.4 | 42.9            | 41.6 | 42.4 |
| 150                           | 39.5         | 40.3 | 39.2 | 42.8            | 42.8 | 43.8 |

**Table S3.** Surface temperatures of heating plate and aerogel throughout thermal insulation experiment. Each row corresponds to one temperature setting, and three measurements were taken on each surface at each setting 5 min after the plate temperature equilibrated.

| Heating Plate Temperature (°C) |       |       | Aerogel Temperature (°C) |      |      |
|--------------------------------|-------|-------|--------------------------|------|------|
| 43.0                           | 42.2  | 42.6  | 24.6                     | 24.4 | 24.6 |
| 51.6                           | 53.6  | 50.0  | 25.4                     | 26.2 | 25.0 |
| 81.9                           | 82.9  | 84.0  | 26.0                     | 26.4 | 25.7 |
| 105.8                          | 111.9 | 112.8 | 26.4                     | 26.4 | 25.3 |
| 121.7                          | 117.4 | 123.0 | 27.4                     | 26.6 | 25.9 |

**Table S4.** Surface temperatures of heating plate and aerogel over time at maximum heating plate temperature (approximately 120 °C).

| Time (min) | Heating Plate Temperature (°C) |       |       | Aerogel Temperature (°C) |      |      |
|------------|--------------------------------|-------|-------|--------------------------|------|------|
| 5          | 121.7                          | 117.4 | 123.0 | 27.4                     | 26.6 | 25.9 |
| 30         | 119.8                          | 121.2 | 120.9 | 28.8                     | 29.2 | 30.0 |
| 60         | 120.1                          | 120.4 | 118.9 | 29.3                     | 30.9 | 30.0 |
| 90         | 118.8                          | 119.6 | 120.8 | 30.1                     | 30.9 | 29.4 |
| 120        | 119.1                          | 119.2 | 120.5 | 30.0                     | 28.9 | 29.7 |
